# Supplementary figures and images for: Centrosome Movements Are TUBG1-Dependent
Source: MDPI journal article supplement (doi:10.3390/ijms241713154), 2023-08-24

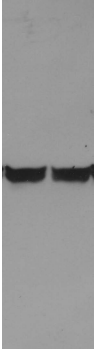

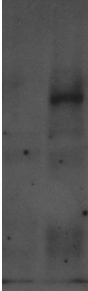

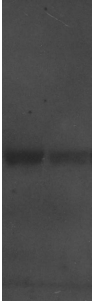

Supplement: s1 [file s1]
